# Supplementary material
Source: Royal Society of Chemistry journal article supplement (doi:10.1039/d6mh00679e)
Supplement: d6mh00679e1.pdf [file d6mh00679e1.pdf]

## Electronic supplementary information (ESI)

### Cuttlebone-inspired PMIA Membranes with Symmetric Porous Structure for Enhanced Stability of Ultrafiltration

*Jiaqing Su<sup>a,b</sup>, Yuxiang Zhu<sup>a</sup>, Cheng Huang<sup>a,c</sup>, Yixin Luo<sup>a,c</sup>, Dexin Kong<sup>a</sup>,  
Jingyao Wang<sup>a</sup>, Xiao Chen<sup>a,b,c,\*</sup>, and Pengchao Zhang<sup>a,b,c,\*</sup>*

- a. State Key Laboratory of Advanced Technology for Materials Synthesis and Processing, School of Materials Science and Engineering, Wuhan University of Technology, Wuhan 430070, China.
- b. Hubei Longzhong Laboratory, Wuhan University of Technology Xiangyang Demonstration Zone, Xiangyang 441000, China.
- c. Sanya Science and Education Innovation Park, Wuhan University of Technology, Sanya 572024, China.

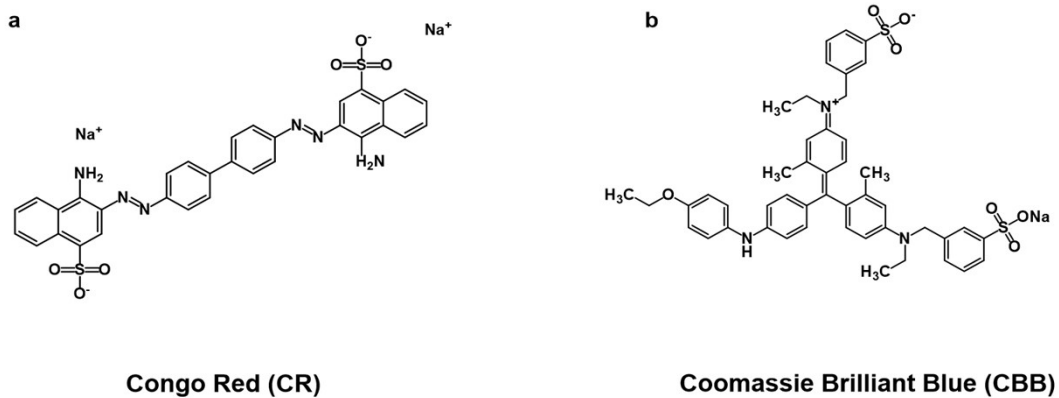

**Fig. S1** Chemical structure of (a) Congo Red and (b) Coomassie Brilliant Blue.

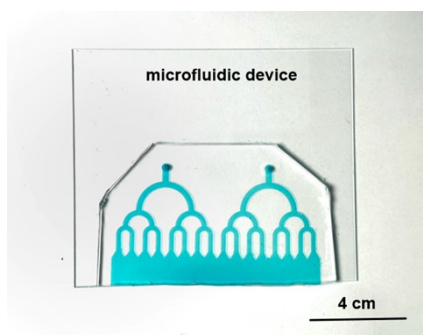

**Fig. S2** Optical photographs of the prepared microfluidic device.

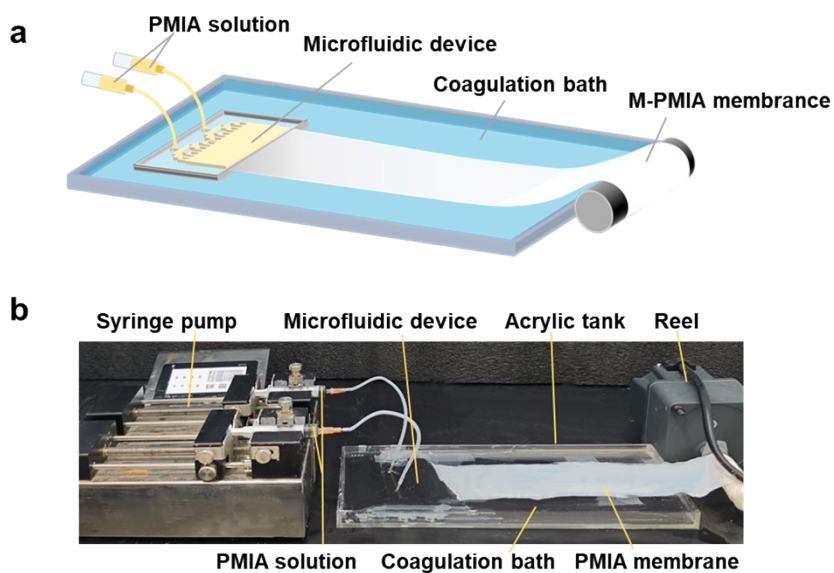

**Fig. S3** (a) Schematic and (b) photographic images of PMIA membrane fabrication via microfluidic technology.

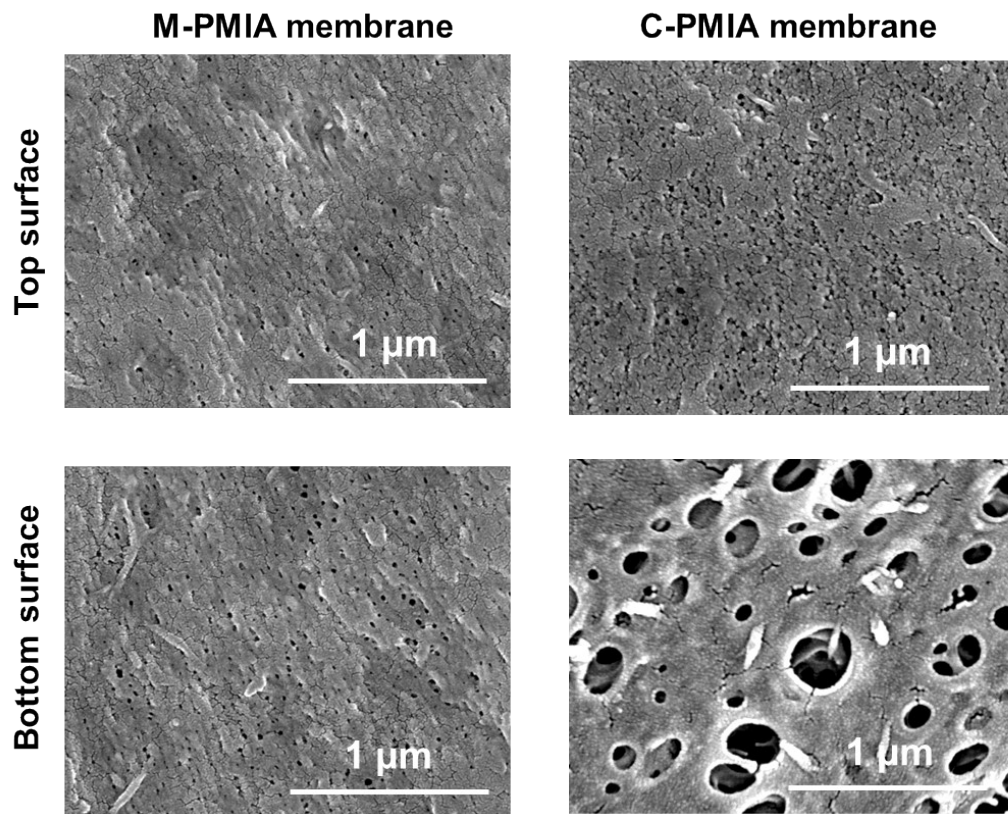

Fig. S4 Top and bottom surface SEM images of the M-PMIA and C-PMIA membranes.

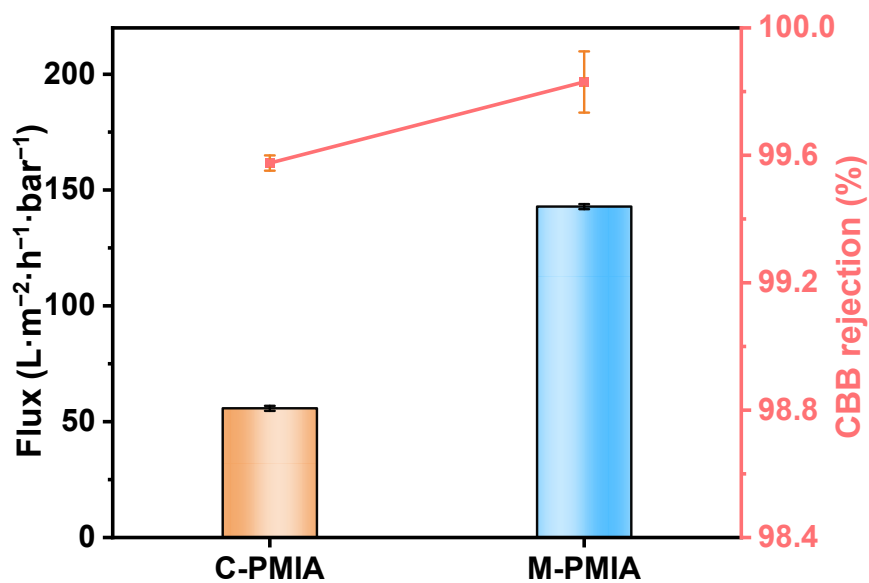

Fig. S5 CBB dye solution separation performance of the M-PMIA and C-PMIA membranes.

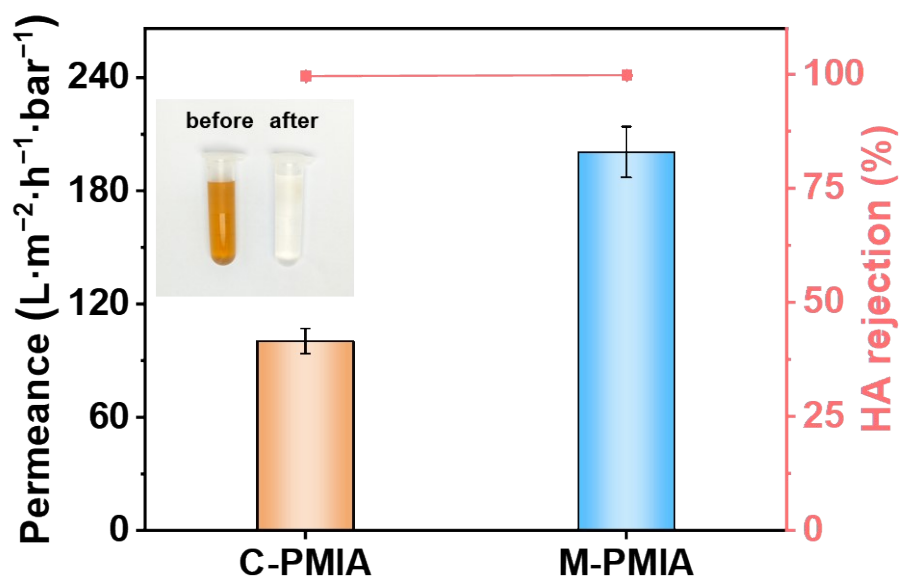

Fig. S6 Separation performance of M-PMIA and C-PMIA membranes for HA.

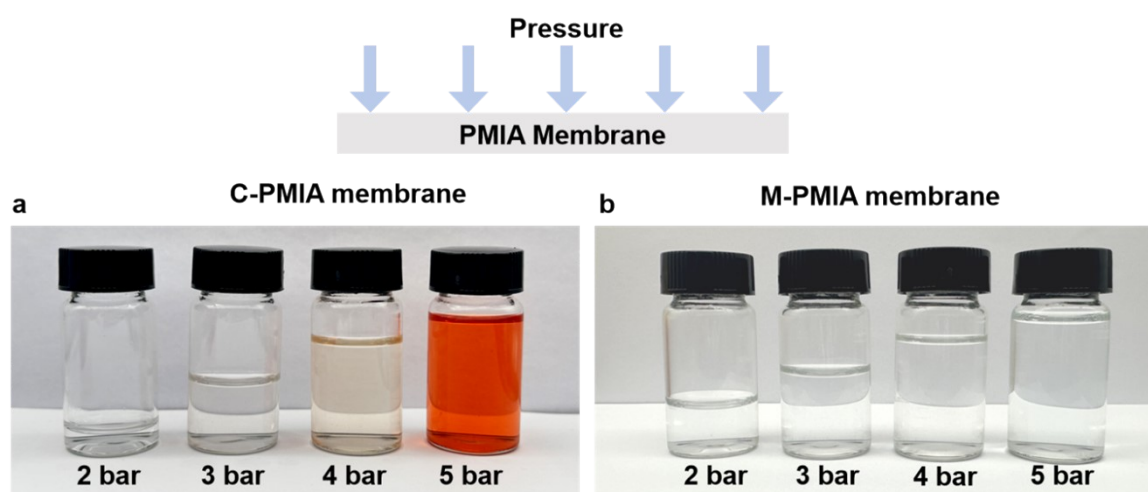

Fig. S7 Optical photograph of CR dye solution after (a) C-PMIA and (b) M-PMIA membrane separation under different pressure conditions.

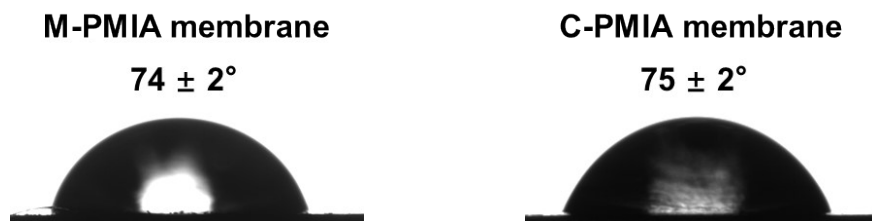

**Fig. S8** Images of water contact angles of the M-PMIA and C-PMIA membranes.

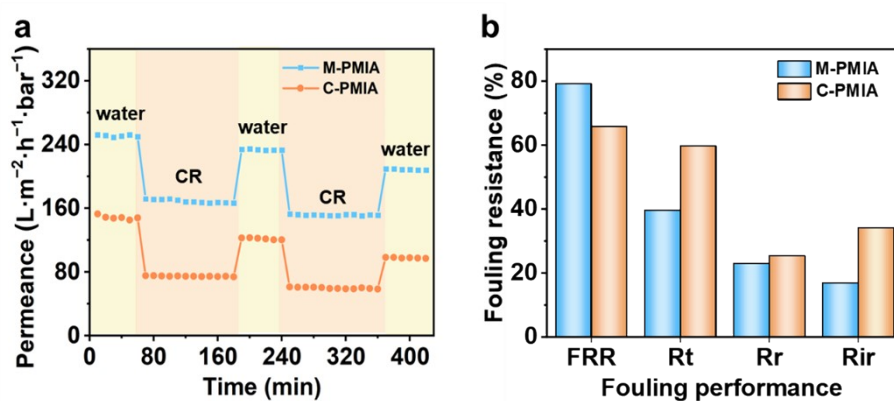

**Fig. S9** (a) Anti-fouling performance of the M-PMIA and C-PMIA membranes (b)

The corresponding anti-fouling indexes ( $FRR$ ,  $R_t$ ,  $R_r$ ,  $R_{ir}$ ) of the M-PMIA and C-PMIA membranes.

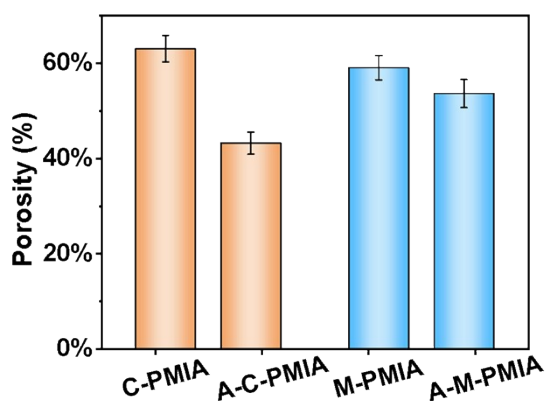

**Fig. S10** Porosity of the C-PMIA membranes and M-PMIA membranes before and after 1.5 hours testing under 2 bar pressure of pure water.

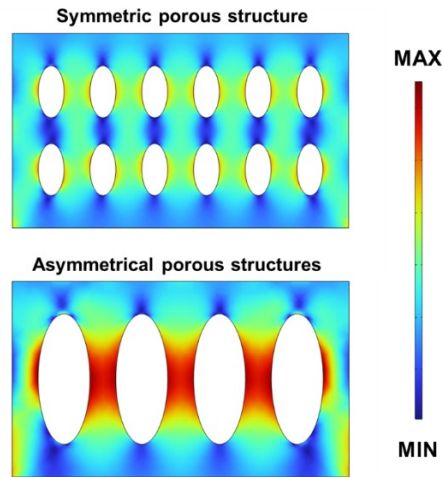

**Fig. S11** Finite element simulation of stress distribution in symmetric and asymmetric pore structures.

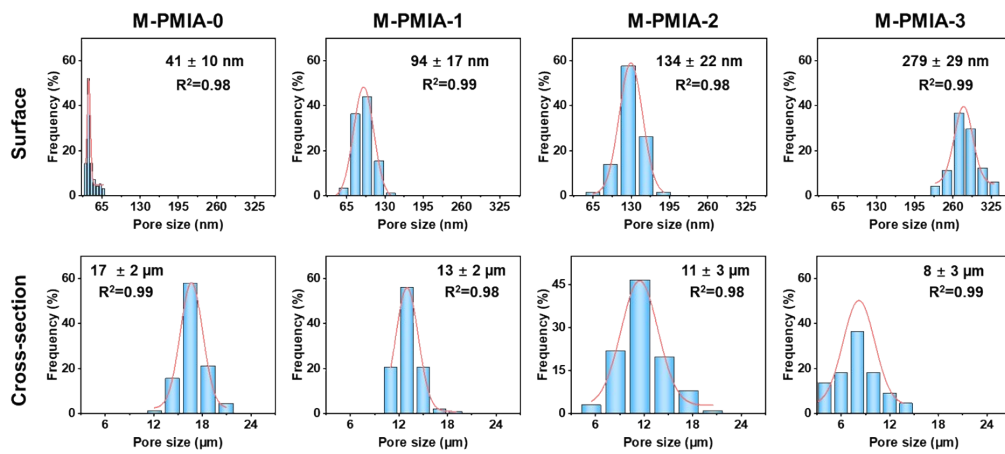

**Fig. S12** The pore size distribution curves of surface and cross-sectional pores.

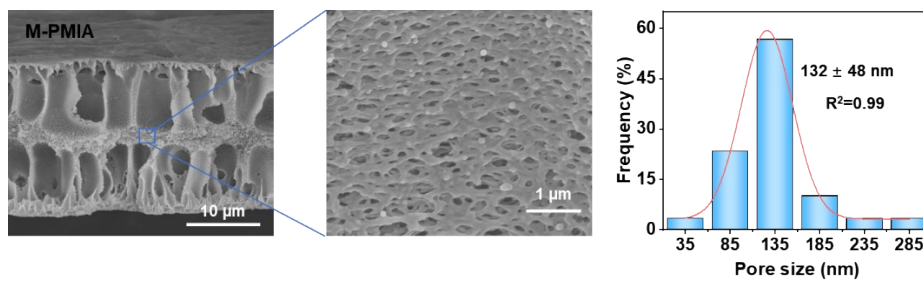

**Fig. S13** The pore size distribution curve of the magnified cross-sectional spongy pore region.

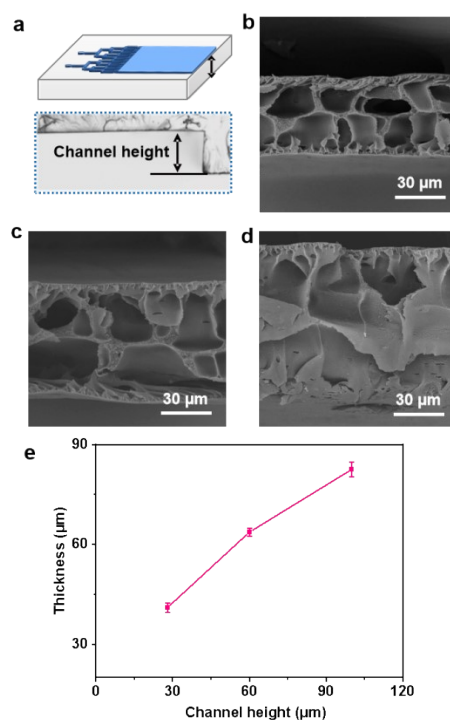

**Fig. S14** Regulation of the thickness of the M-PMIA membranes. Thickness of the M-PMIA membranes by varying the microfluidic channel heights. (a) Optical photographs of the microchannel. (b) (c) and (d) SEM images of the M-PMIA membranes with different thicknesses. (e) The correlation between the thickness of the M-PMIA membranes and the microchannel heights.

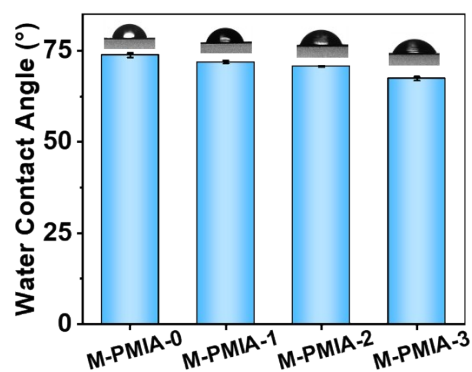

**Fig. S15** Water contact angle of the M-PMIA membranes.

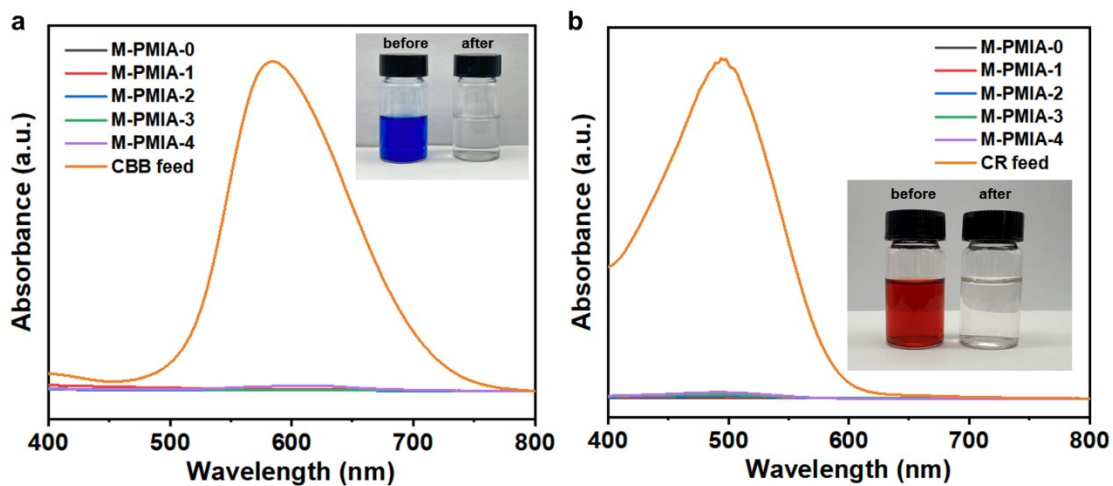

**Fig. S16** UV-vis spectra of (a) CBB dye and (b) CR dye solutions before and after separation by the M-PMIA membranes.

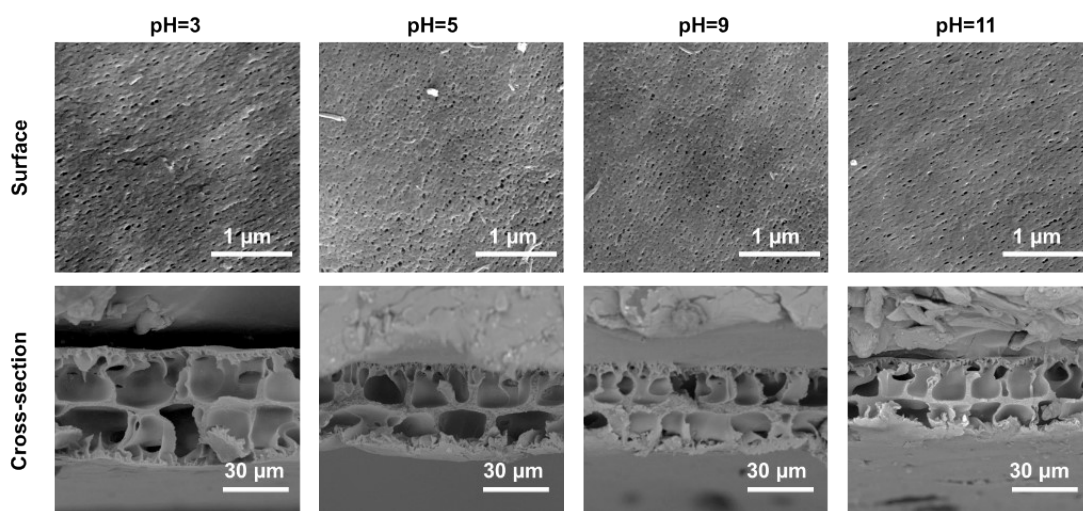

**Fig. S17** Surface and cross-sectional SEM images of the M-PMIA-1 membrane after 72 h of immersion in solutions with different pH.

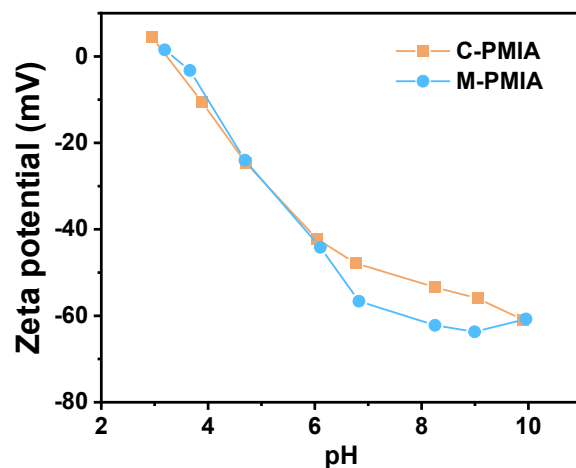

**Fig. S18** Surface potential of the C-PMIA and M-PMIA membranes.

**M-PMIA membrane**

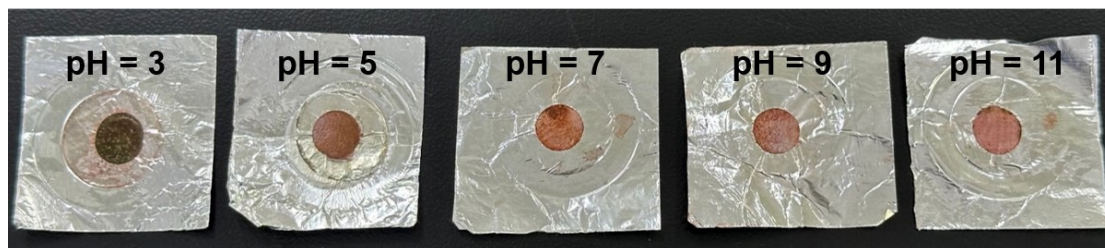

**Fig. S19** Optical photograph of M-PMIA membrane after testing in different pH dye environments.

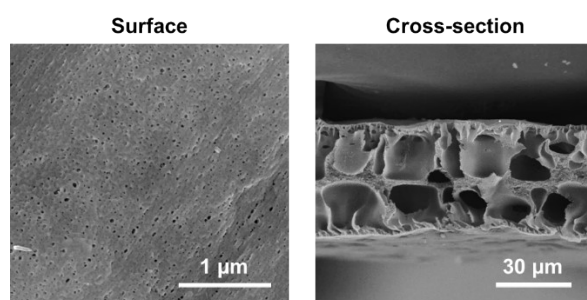

**Fig. S20** Surface and cross-sectional SEM images of the M-PMIA-1 membrane after heating at 70°C for 72 h.

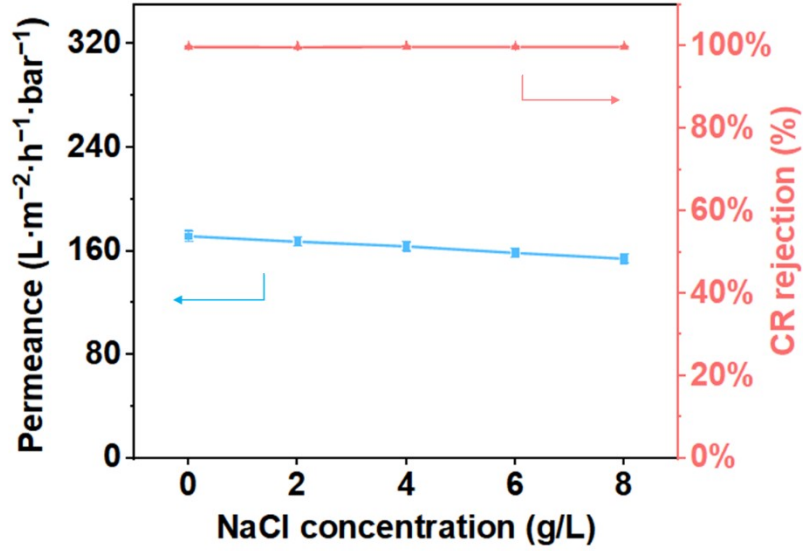

**Fig. S21** Separation performance of the M-PMIA-1 membrane in 100 ppm Congo red mixed with NaCl solutions at different concentrations.

**Table S1** Performance comparison of the M-PMIA membranes and reported TUF membranes.

| Membrane type       | CR Permeability (L·m <sup>-2</sup> ·h <sup>-1</sup> ·bar <sup>-1</sup> ) | CR rejection (%) | Operating condition (MPa) | Structure feature          | Stress (MPa) | Breaking elongation (%) | Young's modulus (MPa) | References |
|---------------------|--------------------------------------------------------------------------|------------------|---------------------------|----------------------------|--------------|-------------------------|-----------------------|------------|
| PES/PAES            | 23                                                                       | 96%              | 0.6                       | Finger-like pore structure | 6            | 50%                     | —                     | [1]        |
| AMPS-PANI           | 95                                                                       | 98.8%            | 0.1                       | Finger-like pore structure | 12.6         | 42.5%                   | 75.4                  | [2]        |
| TOCNF-PEI-GA        | 27                                                                       | 99.75%           | 0.3                       | Finger-like pore structure | 18.7         | 22.38%                  | 243.1                 | [3]        |
| PES/SPSF            | 76                                                                       | 99.2%            | 0.1                       | Sponge-like pore structure | 6.9          | —                       | —                     | [4]        |
| PI/SiO <sub>2</sub> | 133                                                                      | 91.21%           | 0.4                       | Finger-like pore structure | 2.6          | —                       | —                     | [5]        |
| SPAA6/S20           | 6                                                                        | 99.8%            | 0.1                       | Sponge-like pore structure | 2.9          | —                       | —                     | [6]        |
| PI/AA-CMMT          | 95                                                                       | 98%              | 0.3                       | Finger-like pore structure | —            | —                       | —                     | [7]        |
| PES-SPSF/PD         | 61                                                                       | 99.7%            | 0.1                       | Finger-like pore structure | —            | —                       | —                     | [8]        |
| Polyester           | 88                                                                       | 99.2%            | 0.1                       | Finger-like pore structure | —            | —                       | —                     | [9]        |
| M-PMIA              | 180                                                                      | 99.8%            | 0.2                       | Symmetric porous structure | 4.3          | 18%                     | 59.3                  | This work  |

## References

1. H. Cui, S. Fan, Z. Zhou, Y. Du, W. Chen, C. Xiang, J. Zhang, D. Wang, S. Zhang, P. Zhang and H. Matsuyama, *Sep. Purif. Technol.*, 2025, **376**, 133935.
2. S. Liu, H. Jiang and Y. Li, *Chem. Eng. J.*, 2023, **467**, 143456.
3. L. Du, C. Li, S. Li, W. Zhang and F. Huang, *Chem. Eng. J.*, 2025, **521**, 166706.
4. M. Hu, Z. Cui, S. Yang, J. Li, W. Shi, W. Zhang, C. Matindi, B. He, K. Fang and J. Li, *J. Membr. Sci.*, 2021, **618**, 118746.
5. Z. Liu, R. Qiang, L. Lin, X. Deng, X. Yang, K. Zhao, J. Yang, X. Li, W. Ma and M. Xu, *J. Membr. Sci.*, 2022, **658**, 120747.
6. D. Liu, Z. Zhu, Y. Zhao, Y. Chen, Y. Tan and Y. Zhang, *Science of The Total Environment*, 2019, **695**, 133908.
7. W. Ma, X. Yang, L. Lin, H. Li, H. Shang, H. Wu, M. Hou, Z. Guo, Z. Liu, J. Yang and B. Li, *J. Membr. Sci.*, 2025, **723**, 123937.
8. Y. Zhao, Y. Liao, G. S. Lai, Y. Yin and R. Wang, *J. Membr. Sci.*, 2023, **685**, 121908.
9. M.-M. Tang, X.-G. Jin, X. Tang, M. Yu, X.-H. Ma and Z.-L. Xu, *Sep. Purif. Technol.*, 2025, **353**, 128476.
